# Supplementary material for: Pre-target neural oscillations predict variability in the detection of small pitch changes
Source: PLOS journal article supplement (doi:10.1371/journal.pone.0177836), 2017-05-18
Supplement: S1 (10.1371/journal.pone.0177836.s001) [file journal.pone.0177836.s001]

## A Supplementary Methods

### A.1 Calculation of the Evoked Response

Denote the subjects with  $i = \{1, \dots, 19\}$  the sources with  $j_i = \{1, \dots, N_{i_j}\}$  where  $N_{i_j}$  denotes the subject-specific number of sources, the task type with  $k \in \{standard, hard, easy\}$ , the number of task repetitions with  $l_k = \{1, \dots, L_k\}$  where  $L_k$  is the total number of analyzed trials in each task type, and the time relative to the onset of the fourth tone in milliseconds with  $t = \{\dots, -\frac{1}{2.4}, 0, \frac{1}{2.4}, \dots\}$ . Suppressing the double subscripts, we then compute

$$ERP_{ijkt} = \frac{1}{N_{ik}^{correct}} \sum_{l=1}^{L_k} x_{ijklt} \mathbb{1}_{correct},$$

where  $N_{ik}^{correct}$  is the task- and subject-specific number of correctly detected trials.  $x_{ijklt}$  denotes the MEG source time series as well as the 2 EEG sensor time series, and  $\mathbb{1}_{correct}$  is an indicator function that takes the value 1 if the tone was correctly detected and 0 otherwise. For this analysis, we used the short trial length  $t = [-100, +100]ms$ .

To project the difference between conditions  $k = \{hard, easy\}$  on the cortical surface, we computed the difference of the low-pass filtered, absolute values to the standard condition,  $ERP_{ijkt}^{diff} = |ERP_{ijkt}^{filt}| - |ERP_{ij,standard,t}^{filt}|$ . The data were then standardized with respect to the baseline period,  $t = [-100, 0]ms$ , by subtracting the mean  $\overline{ERP}_{ijk}^{diff} = \frac{1}{240} \sum_{t=-100}^0 ERP_{ijk_{diff}t}^{diff}$  and dividing by the corresponding standard deviation, for  $k \in \{hard, easy\}$ . Denote the normalized ERP with  $ERP_{ijkt}^{diff, norm}$ .

### A.2 $d'$ and bias

$d'$  is calculated from each individual subject based on the performance according to the following (Macmillan and Creelman, 2005):

$$d' = z(H) - z(F)$$

$z$  is the inverse of the normal distribution, H the hit rate and F the false alarm rate.  $d'$  was

calculated for the hard versus standard trials. Therefore the hit and false alarm rate were calculated as follows:

$$H = \sum_{l=1}^{L_{hard}} \mathbb{1}_{correct} / L_{hard}$$

$$F = \sum_{l=1}^{L_{standard}} \mathbb{1}_{incorrect} / L_{standard}$$

In addition the bias  $c$  was determined for the behavioral data:

$$c = -\frac{1}{2}[z(H) + z(F)].$$
